# Supplementary material for: Dorsal ruffles enhance activation of Akt by growth factors
Source: Oxford University Press journal article supplement (doi:10.1242/jcs.220517), 2018-10-17
Supplement: jcs220517supp.pdf [file jcs220517supp.pdf]

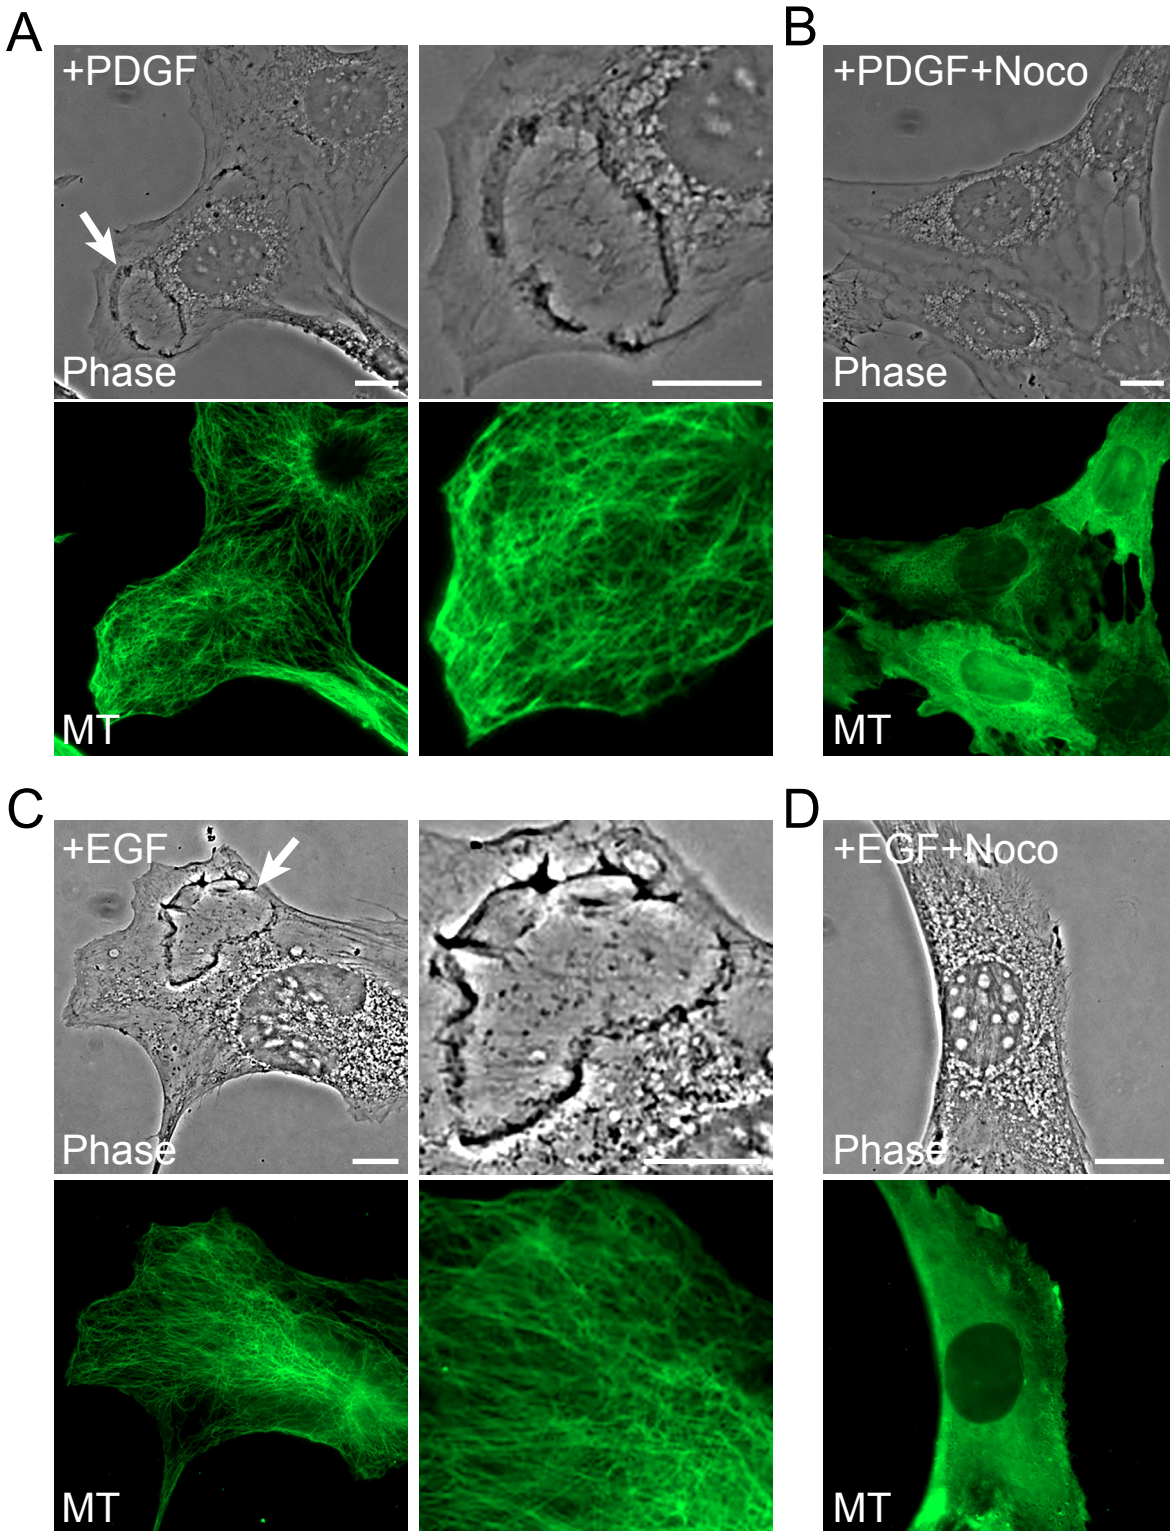

**Figure S1.** Immunofluorescence imaging of tubulin in MEFs stimulated by EGF or PDGF. **(A)** PDGF induced CDR (arrow and enlarged image). Microtubules (MT) underlie CDR. **(B)** Nocodazole blocked PDGF-induced CDR without otherwise altering cell morphology. Tubulin staining shows that nocodazole depolymerized microtubules. **(C)** EGF induced CDR without significantly altering the microtubule network (arrow and enlarged image). **(D)** Nocodazole depolymerized microtubules and blocked PDGF-induced CDR. Scale bar = 10  $\mu$ m

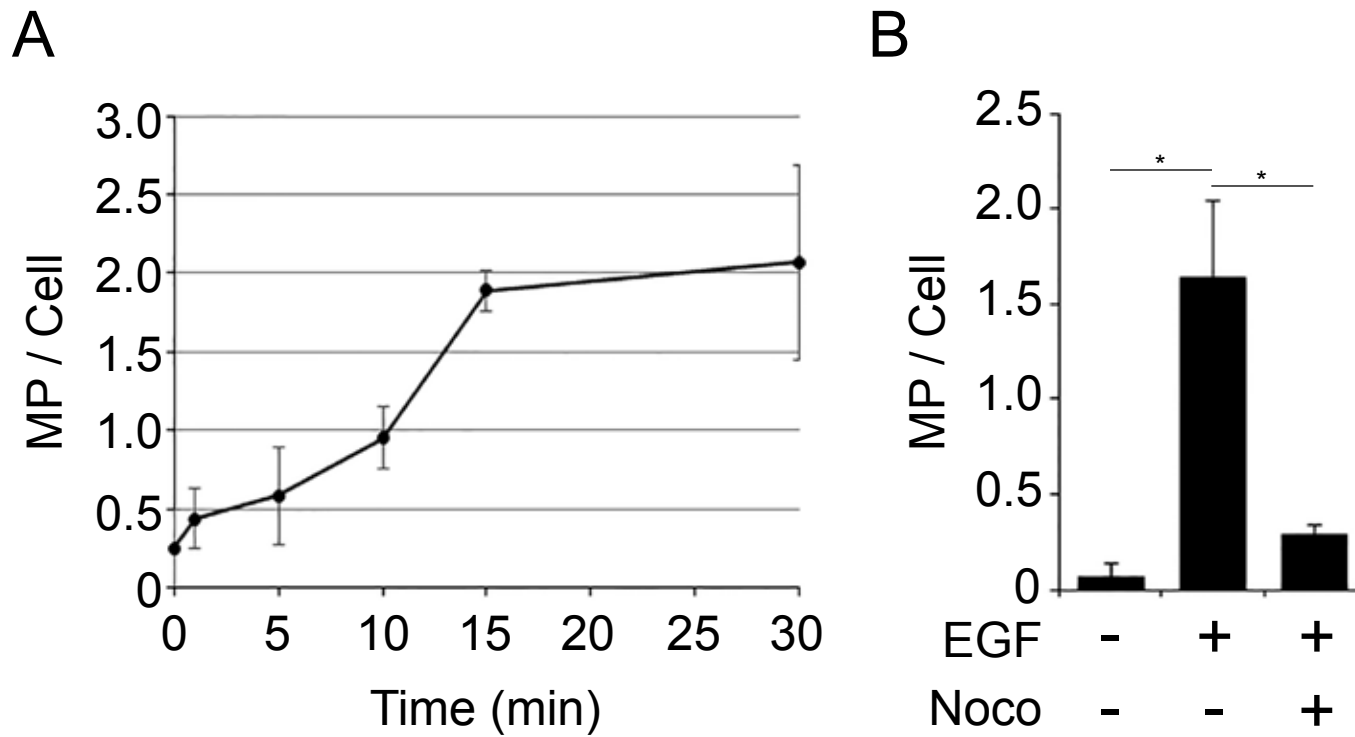

**Figure S2.** EGF-induced macropinocytosis is inhibited by noco-dazole. **(A)**. Time-course of EGF-induced macropinocytosis. MEF were stimulated with EGF in the presence of FDX, then washed, fixed and scored for macropino-somes. The number of macropinosome in EGF-treated MEF increased 15 min after the treatment. **(B)**. Nocodazole treatment blocked EGF-induced macropinocytosis. Cells were incubated 15 min with FDX, then washed, fixed and scored for macropinosomes. More than 15 cells were observed for each condition. A one-way ANOVA was applied for statistical analysis. \* $p < 0.05$ .

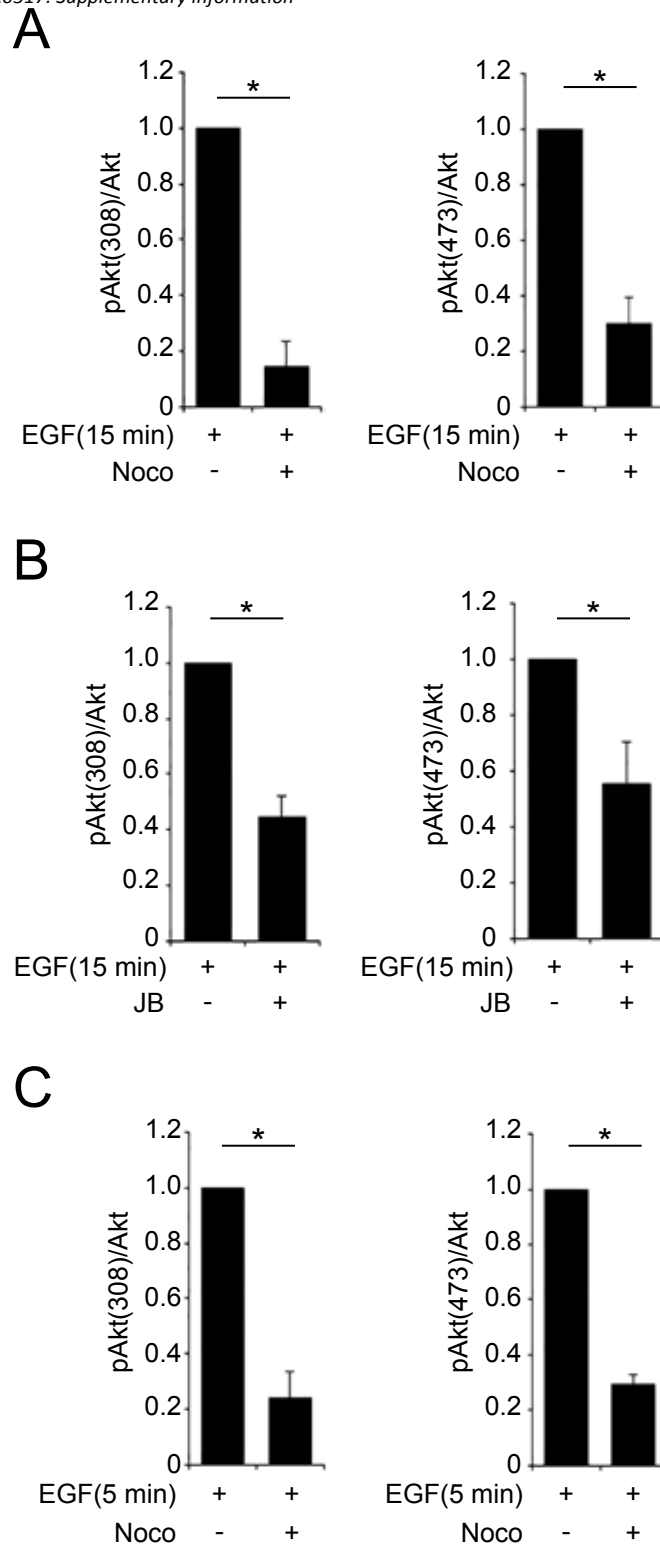

**Figure S3.** Quantification of western blots confirm that EGF-induced pAkt was attenuated by cytoskeletal inhibitors. **(A)** Quantification of western blot results on pAkt(308) and pAkt(473) after EGF stimulation (15 min) with or without nocodazole (Noco). **(B)** Quantification of western blot results on pAkt(308) and pAkt(473) after EGF stimulation (15 min) with or without JB. **(C)** Quantification of western blot results on pAkt(308) and pAkt(473) after EGF stimulation (5 min) with or without nocodazole (Noco). Three independent experiments were carried out for the quantification. \* $p < 0.05$ .

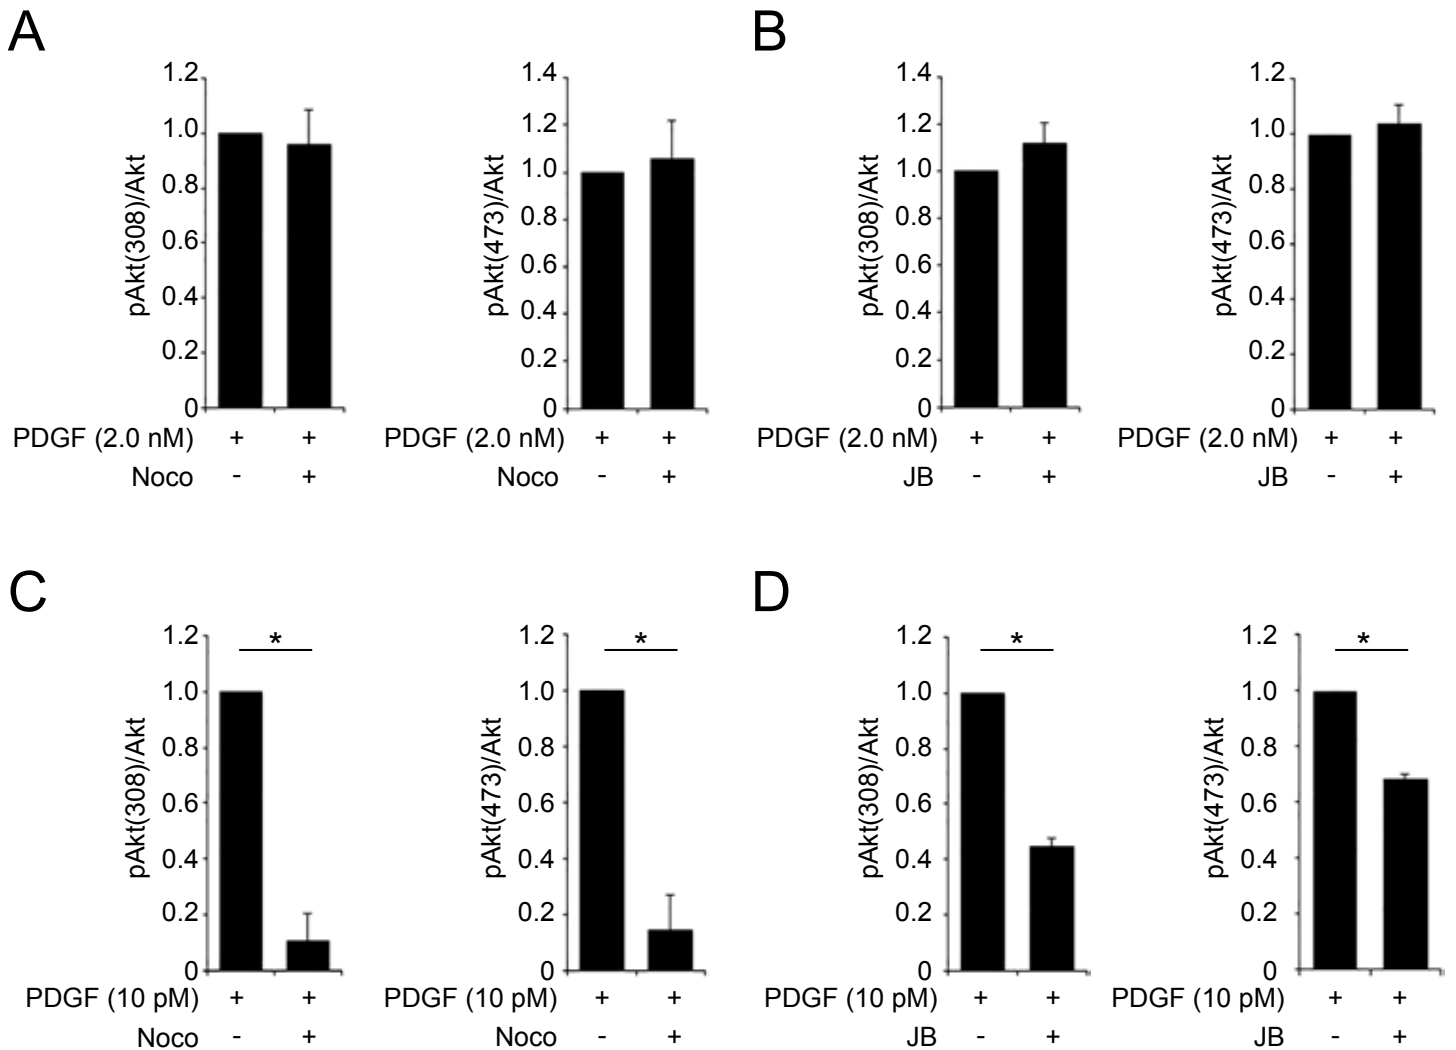

**Figure S4.** Akt phosphorylation in response to 10 pM PDGF was blocked by cytoskeletal inhibitors. **(A, B)** Quantification of western blot results on pAkt(308) and pAkt(473) after PDGF stimulation (2.0 nM) with/without nocodazole (Noco) (A) or J/B (B). **(C, D)** Quantification of western blot results on pAkt(308) and pAkt(473) after PDGF stimulation (10 pM) with/without nocodazole (Noco) (C) or J/B (D). Three independent experiments were carried out for each panel. \* $p < 0.05$ .

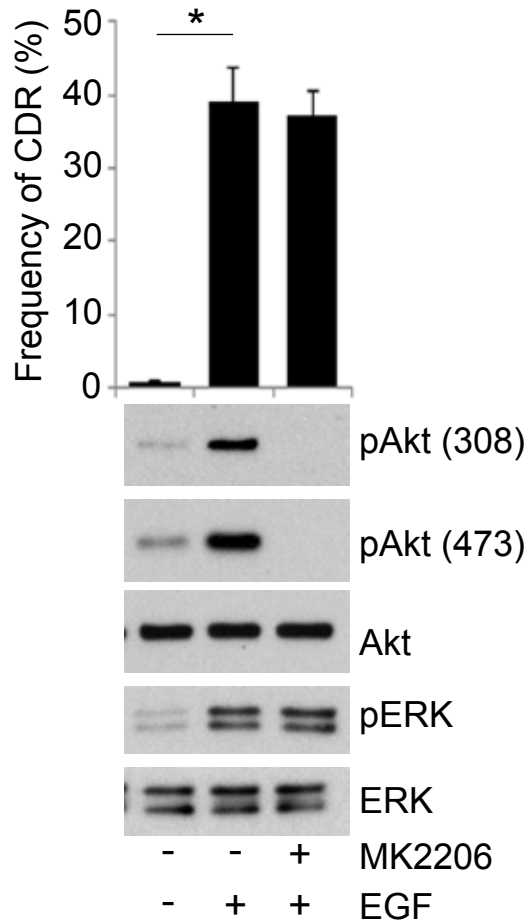

**Figure S5.** Effects of the Akt inhibitor MK2206 on CDR and signaling by EGF. MK2206 blocked EGF-induced Akt phosphorylation, but not EGF-induced CDR formation or ERK phosphorylation.

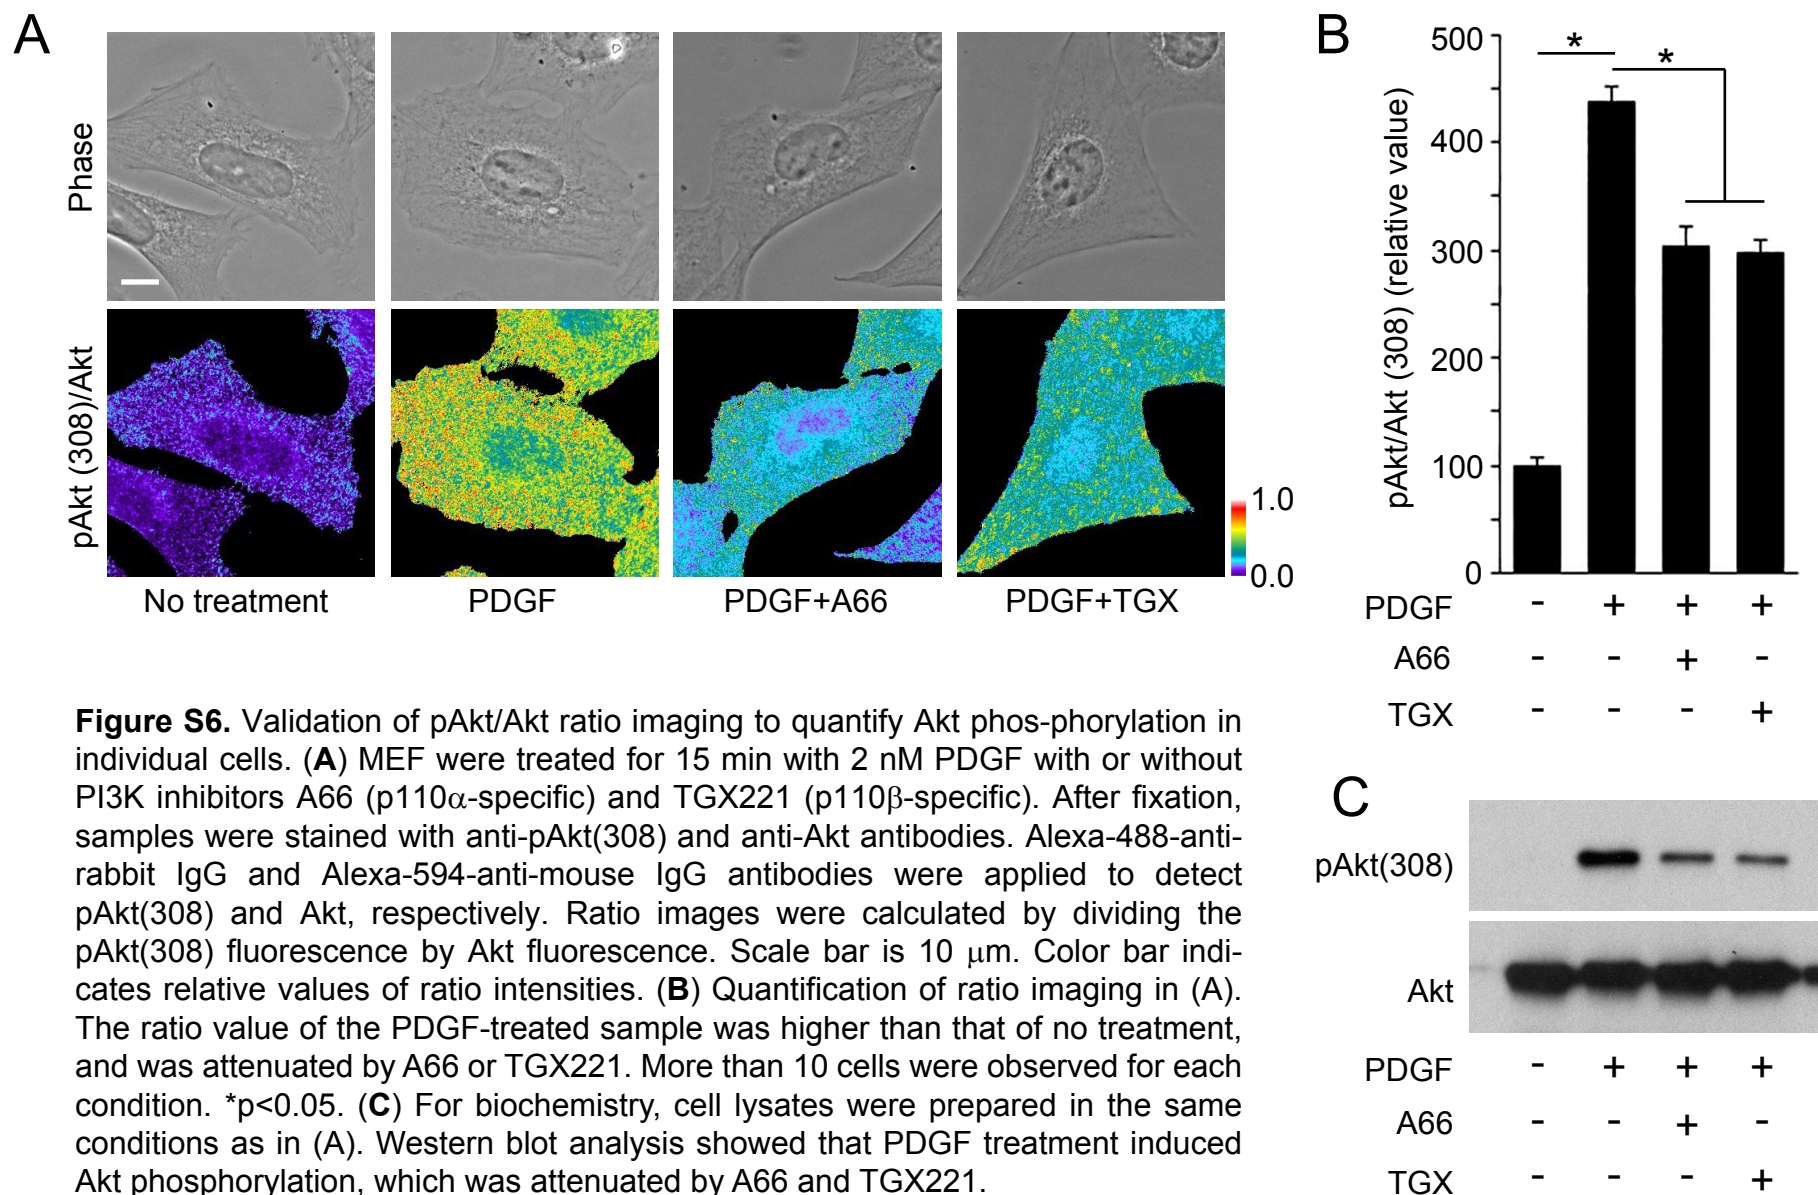

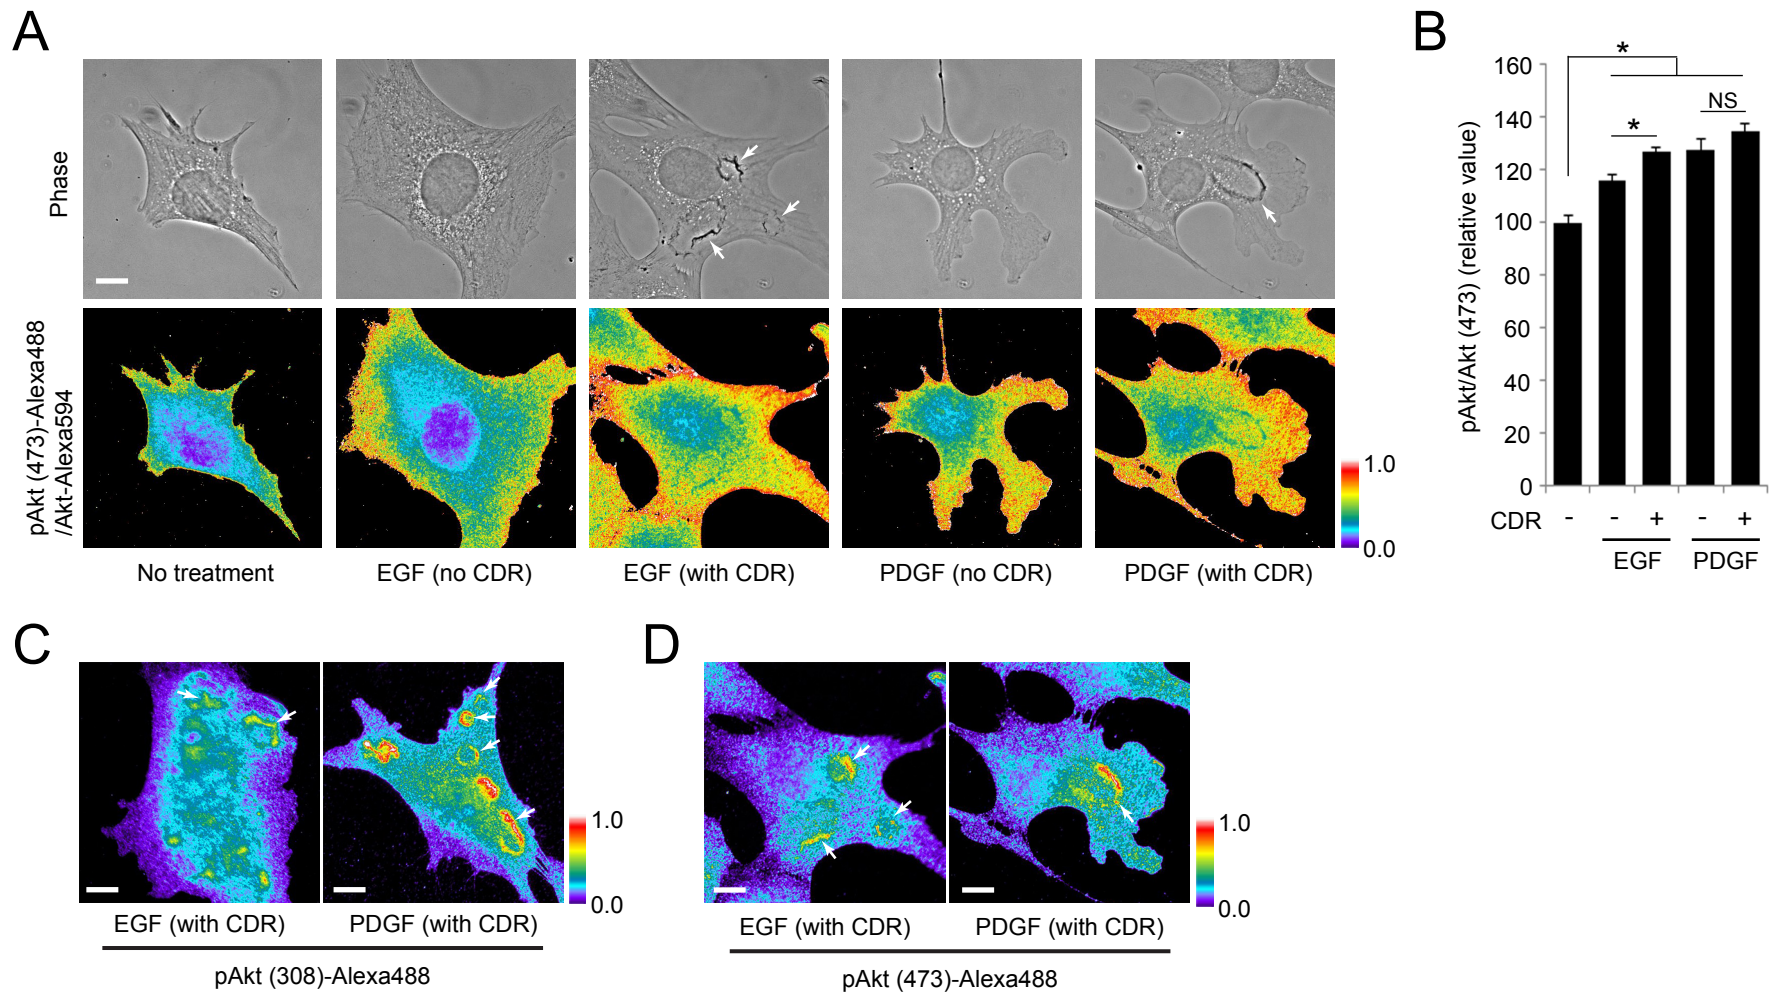

**Figure S7.** Correlation between the formation of CDR and the magnitude of Akt phosphorylation. **(A)** Phase and ratio (pAkt(473)/Akt) images for MEF in different conditions, as in Figure 4. Scale bar is 10  $\mu$ m. **(B)** Quantification of ratio imaging in (A). The relative ratio values of EGF-stimulated cells showing CDR (EGF, CDR+) were significantly higher than those of EGF-stimulated cells showing no CDR (EGF, CDR-). \* $p < 0.05$ . More than 10 cells were observed for each assay. \* $p < 0.05$ . **(C)** pAkt(308) images of MEF showing CDR induced by EGF (left) or PDGF (right). Cells were treated with EGF (16 nM) or PDGF (2 nM) for 3 min. Arrows indicate CDR. Scale bar = 10  $\mu$ m. **(D)** pAkt(473) images of MEF showing CDR induced by EGF (left) or PDGF (right) from (A). Arrows indicate CDR. Scale bar = 10  $\mu$ m. All color bars indicate relative values of ratio intensities.

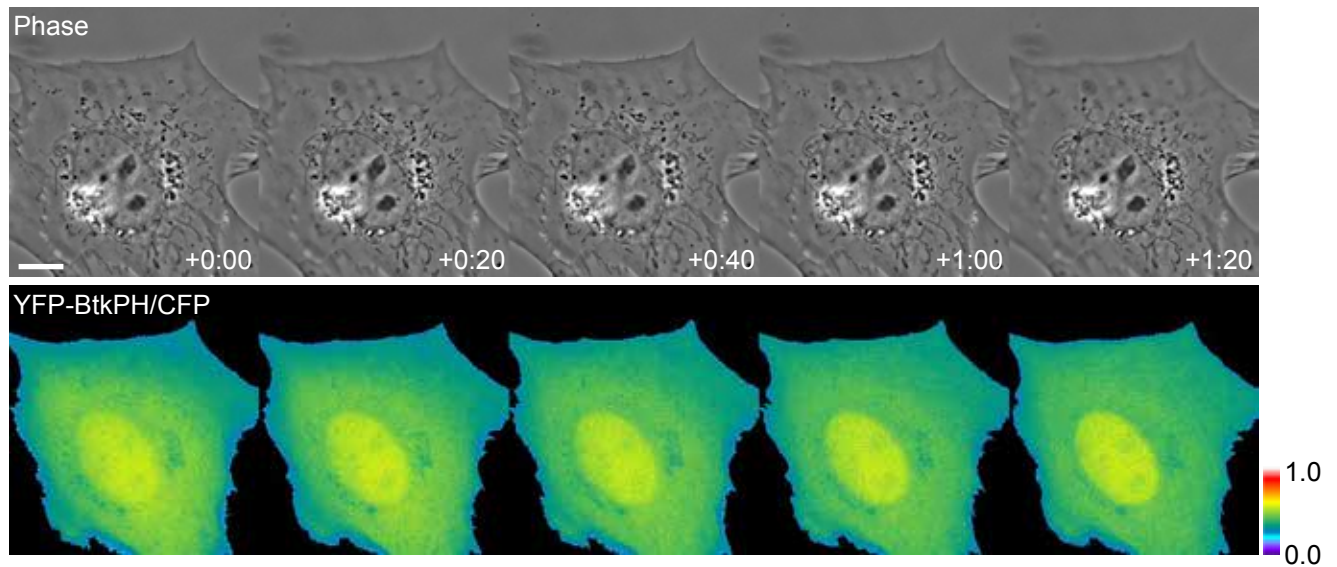

**Figure S8.** Ratio imaging of unstimulated MEF. Live-cell imaging of MEF expressing YFP-Btk-PH, a probe protein for PIP3, and CFP as a volume reference. Time over the observation (no stimulation) is indicated at bottom of phase contrast images (minutes : seconds). Scale bar = 10  $\mu$ m. Color bar indicates relative value of ratio intensities.
